# Supplementary material
Source: PubMed Central journal article supplement (PMC8373628)
Supplement: NIHMS1662224-supplement-1.pdf [file NIHMS1662224-supplement-1.pdf]

S1 Table. Supplementary primers used for sequencing *tp0136*

| Primer Name     | Sequence             |
|-----------------|----------------------|
| TP0136_Int_F476 | CGGACGAACAGTTTCTCGAT |
| TP0136_Int_F842 | CGCTGTGTCTTGCGATTTT  |
| TP0136_Int_R673 | TGACGCTTGCCAGAATGGGC |
| TP0136_Int_R936 | GGAGTTCGCTTCCAGCTTA  |

S2 Table. Incomplete MLST types

| Source            | MLST Type | ECDCT Type |
|-------------------|-----------|------------|
| Bacterial Isolate | X.1.3     | 15d/g      |
| Blood             | 1.3.X     | 14d/g      |
| Blood             | 1.X.X     | 15d/g      |
| Lesion Swab       | 1.X.1     | 14e/e      |
| Oral Swab         | X.X.X     | 14d/g      |
| Oral Swab         | 1.48.X    | 14e/e      |
| Oral Swab         | 1.X.X     | 14e/f      |
| Oral Swab         | X.X.X     | 14e/g      |

MLST, multilocus sequence typing; ECDCT, enhanced CDC typing
